# Supplementary material for: Gene Loss Dominates As a Source of Genetic Variation within Clonal Pathogenic Bacterial Species
Source: PubMed Central journal article supplement (PMC4558853; doi:10.1093/gbe/evv135), 2015-07-10
Supplement: supp_evv135_Joined_supplementary_data.pdf [file supp_evv135_Joined_supplementary_data.pdf]

Figure S1

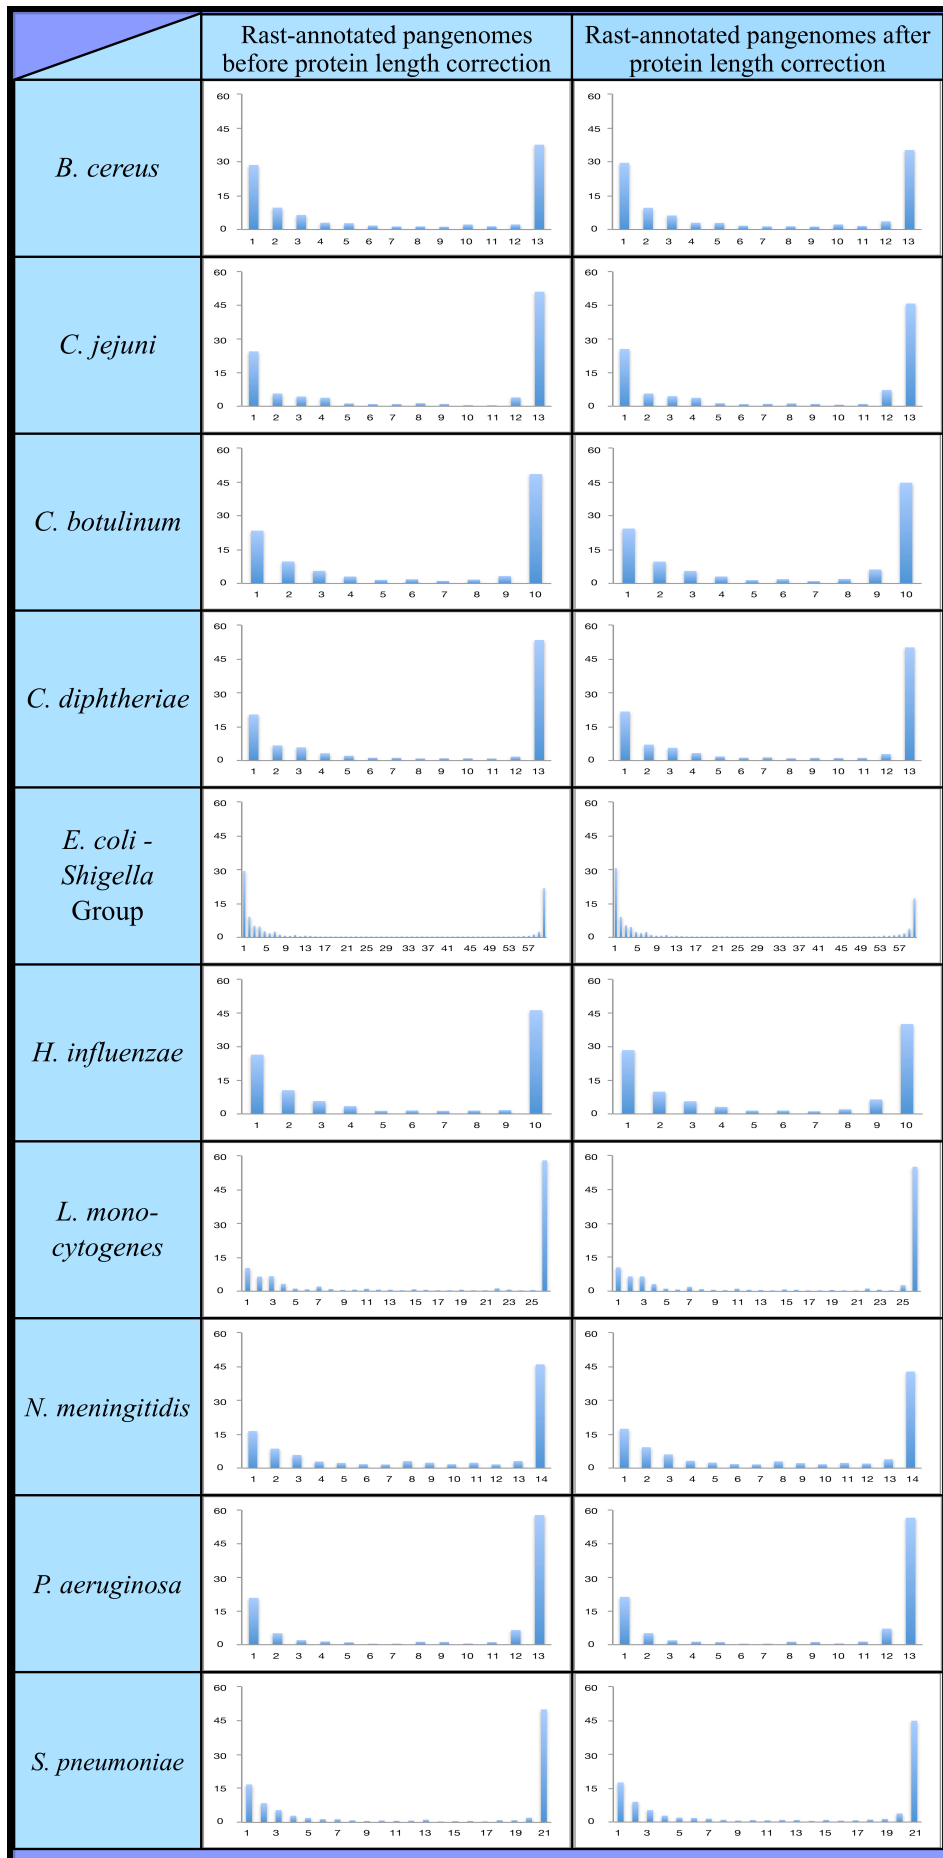

Figure S2

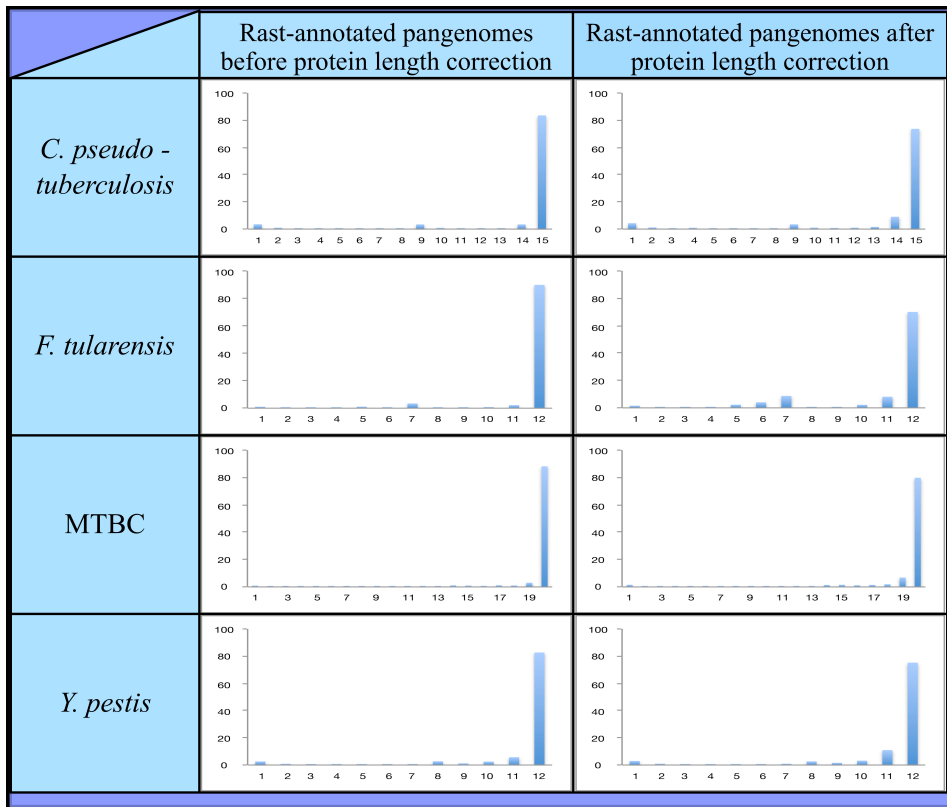

## Supplementary Figure legends

### **Figure S1. Pangenome plots of ten recombining bacterial species based on RAST annotated**

**genomes.** To generate these plots all strains within a species were annotated using the RAST annotation webserver and the pangenomes were generated as described above. Two plots are provided for each species: Left: HGT-artifact corrected pangenome plot – the protein pangenome was compared to the full DNA sequences of the strains from which it was generated. Pangenes appearing in less than 50% of strains within a species at the annotated protein level, but in more than 75% of the strains at the whole DNA level, were removed from the plot; Right: Protein length corrected pangenome plot – for each pangene within the HGT-artifact corrected pangenome lengths of all genes within the pangene group were compared to the length of the longest gene within the group. Genes, whose length was shorter than two thirds of the longest gene length, were removed from the pangene cluster and the pangene distribution was re-drawn.

### **Figure S2. Pangenome plots of four clonal bacterial species based on RAST annotated genomes.**

To generate these plots all strains within a species were annotated using the RAST annotation webserver and the pangenomes were generated as described above. Two plots are provided for each species: Left: HGT-artifact corrected pangenome plot – the protein pangenome was compared to the full DNA sequences of the strains from which it was generated. Pangenes appearing in less than 50% of strains within a species at the annotated protein level, but in more than 75% of the strains at the whole DNA level, were removed from the plot; Right: Protein length corrected pangenome plot – for each pangene within the HGT-artifact corrected pangenome lengths of all genes within the pangene group were compared to the length of the longest gene within the group. Genes, whose length was shorter than two thirds of the longest gene length, were removed from the pangene cluster and the pangene distribution was re-drawn.

**Table S1.** Investigated strains and the percentage of “near core” pangenes absent from each strain

| <i>Bacillus cereus</i>      |                                                |                              |                                       |
|-----------------------------|------------------------------------------------|------------------------------|---------------------------------------|
| Accession number            | Strain Name                                    | Number of genes <sup>a</sup> | Percentage of lost genes <sup>b</sup> |
| NC_003909                   | Bacillus cereus ATCC 10987                     | 5376                         | 1.66                                  |
| NC_004722                   | Bacillus cereus ATCC 14579                     | 4998                         | 3.30                                  |
| NC_006274                   | Bacillus cereus E33L                           | 4960                         | 1.67                                  |
| NC_011658                   | Bacillus cereus AH187                          | 5169                         | 0.21                                  |
| NC_011725                   | Bacillus cereus B4264                          | 5202                         | 0.79                                  |
| NC_011772                   | Bacillus cereus G9842                          | 5245                         | 1.22                                  |
| NC_011773                   | Bacillus cereus AH820                          | 5244                         | 0.51                                  |
| NC_011969                   | Bacillus cereus Q1                             | 4973                         | 0.88                                  |
| NC_012472                   | Bacillus cereus 03BB102                        | 5166                         | 0.39                                  |
| NC_014335                   | Bacillus cereus biovar anthracis str. CI       | 4990                         | 0.68                                  |
| NC_016771                   | Bacillus cereus NC7401                         | 5169                         | 0.21                                  |
| NC_016779                   | Bacillus cereus F837/76                        | 5160                         | 1.03                                  |
| NC_018491                   | Bacillus cereus FRI-35                         | 4953                         | 1.31                                  |
| <i>Campylobacter jejuni</i> |                                                |                              |                                       |
| Accession number            | Strain Name                                    | Number of genes              | Percent of lost genes                 |
| NC_003912                   | Campylobacter jejuni RM1221                    | 1761                         | 0.68                                  |
| NC_008787                   | Campylobacter jejuni subsp. jejuni 81-176      | 1614                         | 0.12                                  |
| NC_009707                   | Campylobacter jejuni subsp. doylei 269.97      | 1643                         | 8.64                                  |
| NC_009839                   | Campylobacter jejuni subsp. jejuni 81116       | 1599                         | 0.19                                  |
| NC_014802                   | Campylobacter jejuni subsp. jejuni ICDCCJ07001 | 1474                         | 10.18                                 |
| NC_017279                   | Campylobacter jejuni subsp.                    | 1583                         | 0.19                                  |

|                                     |                                                         |                        |                                 |
|-------------------------------------|---------------------------------------------------------|------------------------|---------------------------------|
|                                     | jejuni IA3902                                           |                        |                                 |
| NC_017280                           | Campylobacter jejuni subsp.<br>jejuni M1                | 1594                   | 0.63                            |
| NC_017281                           | Campylobacter jejuni subsp.<br>jejuni S3                | 1695                   | 0.53                            |
| NC_018521                           | Campylobacter jejuni subsp.<br>jejuni NCTC 11168-BN148, | 1591                   | 0.13                            |
| NC_018709                           | Campylobacter jejuni subsp.<br>jejuni PT14              | 1576                   | 0.25                            |
| NC_022352                           | Campylobacter jejuni subsp.<br>jejuni 00-2426           | 1656                   | 0.18                            |
| NC_022353                           | Campylobacter jejuni subsp.<br>jejuni 00-2544           | 1683                   | 0.48                            |
| NC_022529                           | Campylobacter jejuni 4031                               | 1639                   | 0.00                            |
| <b><i>Clostridium botulinum</i></b> |                                                         |                        |                                 |
| <b>Accession number</b>             | <b>Strain Name</b>                                      | <b>Number of genes</b> | <b>Percentage of lost genes</b> |
| NC_009495                           | Clostridium botulinum A str.<br>ATCC 3502               | 3385                   | 0.65                            |
| NC_009697                           | Clostridium botulinum A str.<br>ATCC 19397              | 3348                   | 0.75                            |
| NC_009698                           | Clostridium botulinum A str.<br>Hall                    | 3171                   | 1.89                            |
| NC_009699                           | Clostridium botulinum F str.<br>Langeland               | 3436                   | 0.41                            |
| NC_010516                           | Clostridium botulinum B1 str.<br>Okra                   | 3477                   | 0.86                            |
| NC_010520                           | Clostridium botulinum A3 str.<br>Loch Maree             | 3470                   | 2.33                            |
| NC_012563                           | Clostridium botulinum A2 str.<br>Kyoto                  | 3603                   | 0.92                            |
| NC_012658                           | Clostridium botulinum Ba4<br>str. 657                   | 3455                   | 3.15                            |

|                                    |                                           |                        |                                 |
|------------------------------------|-------------------------------------------|------------------------|---------------------------------|
| NC_017297                          | Clostridium botulinum F str.<br>230613    | 3316                   | 5.46                            |
| NC_017299                          | Clostridium botulinum<br>H04402 065       | 3457                   | 2.49                            |
| <i>Corynebacterium diphtheriae</i> |                                           |                        |                                 |
| <b>Accession number</b>            | <b>Strain Name</b>                        | <b>Number of genes</b> | <b>Percentage of lost genes</b> |
| NC_002935                          | Corynebacterium diphtheriae<br>NCTC 13129 | 2159                   | 1.02                            |
| NC_016782                          | Corynebacterium diphtheriae<br>241        | 2091                   | 0.57                            |
| NC_016783                          | Corynebacterium diphtheriae<br>INCA 402   | 2090                   | 0.57                            |
| NC_016785                          | Corynebacterium diphtheriae<br>CDCE 8392  | 2098                   | 0.52                            |
| NC_016786                          | Corynebacterium diphtheriae<br>HC01       | 2100                   | 0.43                            |
| NC_016787                          | Corynebacterium diphtheriae<br>HC03       | 2115                   | 0.24                            |
| NC_016788                          | Corynebacterium diphtheriae<br>HC04       | 2106                   | 0.33                            |
| NC_016789                          | Corynebacterium diphtheriae<br>PW8        | 2105                   | 1.66                            |
| NC_016790                          | Corynebacterium diphtheriae<br>VA01       | 2067                   | 0.10                            |
| NC_016799                          | Corynebacterium diphtheriae<br>31A        | 2204                   | 0.32                            |
| NC_016800                          | Corynebacterium diphtheriae<br>BH8        | 2203                   | 0.68                            |
| NC_016801                          | Corynebacterium diphtheriae<br>C7 (beta)  | 2183                   | 0.46                            |
| NC_016802                          | Corynebacterium diphtheriae<br>HC02       | 2104                   | 0.52                            |

| <i>Corynebacterium pseudotuberculosis</i> |                                              |                        |                                 |
|-------------------------------------------|----------------------------------------------|------------------------|---------------------------------|
| <b>Accession number</b>                   | <b>Strain Name</b>                           | <b>Number of genes</b> | <b>Percentage of lost genes</b> |
| NC_014329                                 | Corynebacterium pseudotuberculosis FRC41     | 2106                   | 1.52                            |
| NC_016781                                 | Corynebacterium pseudotuberculosis 3/99-5    | 2131                   | 0.70                            |
| NC_016932                                 | Corynebacterium pseudotuberculosis 316       | 2099                   | 2.14                            |
| NC_017031                                 | Corynebacterium pseudotuberculosis P54B96    | 2078                   | 0.96                            |
| NC_017300                                 | Corynebacterium pseudotuberculosis 1002      | 2085                   | 0.58                            |
| NC_017301                                 | Corynebacterium pseudotuberculosis C231      | 2086                   | 0.91                            |
| NC_017303                                 | Corynebacterium pseudotuberculosis I19       | 2089                   | 0.48                            |
| NC_017305                                 | Corynebacterium pseudotuberculosis PAT10     | 2073                   | 0.87                            |
| NC_017306                                 | Corynebacterium pseudotuberculosis 42/02-A   | 2046                   | 0.98                            |
| NC_017307                                 | Corynebacterium pseudotuberculosis CIP 52.97 | 2046                   | 2.25                            |
| NC_017308                                 | Corynebacterium pseudotuberculosis 1/06-A    | 1957                   | 4.14                            |
| NC_017462                                 | Corynebacterium pseudotuberculosis 267       | 2140                   | 0.98                            |
| NC_017730                                 | Corynebacterium pseudotuberculosis 31        | 2059                   | 2.96                            |
| NC_017945                                 | Corynebacterium pseudotuberculosis 258       | 2077                   | 2.02                            |
| NC_018019                                 | Corynebacterium pseudotuberculosis Cp162     | 1989                   | 3.97                            |

| <i>Escherichia coli-Shigella</i> Group |                                           |                 |                          |
|----------------------------------------|-------------------------------------------|-----------------|--------------------------|
| Accession number                       | Strain Name                               | Number of genes | Percentage of lost genes |
| NC_000913                              | Escherichia coli str. K-12 substr. MG1655 | 3659            | 0.90                     |
| NC_002655                              | Escherichia coli O157:H7 str. EDL933      | 4099            | 0.85                     |
| NC_002695                              | Escherichia coli O157:H7 str. Sakai       | 4111            | 1.61                     |
| NC_004431                              | Escherichia coli CFT073                   | 4258            | 1.32                     |
| NC_007779                              | Escherichia coli str. K-12 substr. W3110  | 3686            | 0.79                     |
| NC_007946                              | Escherichia coli UTI89                    | 4176            | 0.67                     |
| NC_008253                              | Escherichia coli 536                      | 3999            | 1.28                     |
| NC_008563                              | Escherichia coli APEC O1                  | 3795            | 4.16                     |
| NC_009800                              | Escherichia coli HS                       | 3875            | 2.55                     |
| NC_009801                              | Escherichia coli E24377A                  | 4090            | 1.12                     |
| NC_010468                              | Escherichia coli ATCC 8739                | 3731            | 1.05                     |
| NC_010498                              | Escherichia coli SMS-3-5                  | 4156            | 0.53                     |
| NC_011353                              | Escherichia coli O157:H7 str. EC4115      | 4092            | 2.49                     |
| NC_011415                              | Escherichia coli SE11                     | 4087            | 0.05                     |
| NC_011601                              | Escherichia coli O127:H6 str. E2348/69    | 3915            | 1.61                     |
| NC_011741                              | Escherichia coli IAI1                     | 3882            | 0.26                     |
| NC_011742                              | Escherichia coli S88                      | 3929            | 0.92                     |
| NC_011745                              | Escherichia coli ED1a                     | 4037            | 2.43                     |
| NC_011748                              | Escherichia coli 55989                    | 3962            | 0.88                     |
| NC_011750                              | Escherichia coli IAI39                    | 3941            | 2.82                     |
| NC_011751                              | Escherichia coli UMN026                   | 4157            | 0.72                     |
| NC_011993                              | Escherichia coli LF82                     | 3911            | 0.56                     |
| NC_012759                              | Escherichia coli BW2952                   | 3568            | 2.13                     |
| NC_012967                              | Escherichia coli B str. REL606            | 3665            | 2.21                     |



|           |                                              |      |      |
|-----------|----------------------------------------------|------|------|
| NC_012971 | Escherichia coli BL21(DE3)                   | 3614 | 2.71 |
| NC_013008 | Escherichia coli O157:H7 str.<br>TW14359     | 4090 | 1.74 |
| NC_013353 | Escherichia coli O103:H2 str.<br>12009       | 3946 | 1.12 |
| NC_013361 | Escherichia coli O26:H11 str.<br>11368       | 4036 | 1.29 |
| NC_013364 | Escherichia coli O111:H- str.<br>11128       | 3904 | 1.84 |
| NC_013654 | Escherichia coli SE15                        | 3858 | 0.70 |
| NC_013941 | Escherichia coli O55:H7 str.<br>CB9615       | 4104 | 0.90 |
| NC_016902 | Escherichia coli KO11FL                      | 3991 | 0.38 |
| NC_017625 | Escherichia coli DH1                         | 3676 | 1.03 |
| NC_017626 | Escherichia coli 042                         | 4080 | 1.76 |
| NC_017628 | Escherichia coli IHE3034                     | 4016 | 1.22 |
| NC_017631 | Escherichia coli ABU 83972                   | 4081 | 0.71 |
| NC_017633 | Escherichia coli ETEC H10407                 | 3925 | 1.45 |
| NC_017635 | Escherichia coli W                           | 3936 | 0.69 |
| NC_017641 | Escherichia coli UMNK88                      | 4321 | 0.88 |
| NC_017646 | Escherichia coli O7:K1 str.<br>CE10          | 4183 | 1.20 |
| NC_017652 | Escherichia coli str. 'clone D<br>i14'       | 4242 | 0.73 |
| NC_017656 | Escherichia coli O55:H7 str.<br>RM12579      | 4085 | 0.56 |
| NC_017663 | Escherichia coli P12b                        | 3721 | 6.21 |
| NC_017906 | Escherichia coli Xuzhou21                    | 4025 | 1.61 |
| NC_018650 | Escherichia coli O104:H4 str.<br>2009EL-2050 | 4037 | 0.50 |
| NC_018658 | Escherichia coli O104:H4 str.<br>2011C-3493  | 4064 | 0.49 |
| NC_018661 | Escherichia coli O104:H4 str.                | 4039 | 0.50 |

|                                      |                                                     |                        |                                 |
|--------------------------------------|-----------------------------------------------------|------------------------|---------------------------------|
|                                      | 2009EL-2071                                         |                        |                                 |
| NC_020163                            | Escherichia coli APEC O78                           | 3946                   | 0.38                            |
| NC_022364                            | Escherichia coli LY180                              | 3914                   | 1.28                            |
| NC_022370                            | Escherichia coli PMV-1 main                         | 3901                   | 1.00                            |
| NC_022648                            | Escherichia coli JJ1886                             | 4066                   | 1.03                            |
| NC_004337                            | Shigella flexneri 2a str. 301                       | 3137                   | 12.88                           |
| NC_004741                            | Shigella flexneri 2a str. 2457T                     | 3131                   | 12.94                           |
| NC_007384                            | Shigella sonnei Ss046                               | 3276                   | 8.91                            |
| NC_007606                            | Shigella dysenteriae Sd197                          | 2799                   | 23.26                           |
| NC_007613                            | Shigella boydii Sb227                               | 3121                   | 12.82                           |
| NC_008258                            | Shigella flexneri 5 str. 8401                       | 3208                   | 11.47                           |
| NC_010658                            | Shigella boydii CDC 3083-94                         | 3150                   | 14.35                           |
| NC_016822                            | Shigella sonnei 53G                                 | 3840                   | 3.96                            |
| NC_017328                            | Shigella flexneri 2002017                           | 3397                   | 10.77                           |
| <b><i>Francisella tularensis</i></b> |                                                     |                        |                                 |
| <b>Accession number</b>              | <b>Strain Name</b>                                  | <b>Number of genes</b> | <b>Percentage of lost genes</b> |
| NC_006570                            | Francisella tularensis subsp. tularensis SCHU S4    | 1374                   | 0.51                            |
| NC_007880                            | Francisella tularensis subsp. holarctica LVS        | 1516                   | 0.79                            |
| NC_008245                            | Francisella tularensis subsp. tularensis FSC198     | 1419                   | 0.56                            |
| NC_008369                            | Francisella tularensis subsp. holarctica OSU18      | 1397                   | 2.15                            |
| NC_009257                            | Francisella tularensis subsp. tularensis WY96-3418  | 1452                   | 1.65                            |
| NC_009749                            | Francisella tularensis subsp. holarctica FTNF002-00 | 1370                   | 1.53                            |
| NC_010677                            | Francisella tularensis subsp. mediasiatica FSC147   | 1286                   | 6.07                            |
| NC_016933                            | Francisella tularensis TIGB03                       | 1419                   | 0.21                            |
| NC_016937                            | Francisella tularensis subsp.                       | 1418                   | 0.21                            |

|                                      |                                                      |                        |                                 |
|--------------------------------------|------------------------------------------------------|------------------------|---------------------------------|
|                                      | tularensis TI0902                                    |                        |                                 |
| NC_017453                            | Francisella tularensis subsp.<br>tularensis NE061598 | 1581                   | 0.19                            |
| NC_019537                            | Francisella tularensis subsp.<br>holartica F92       | 1564                   | 1.79                            |
| NC_019551                            | Francisella tularensis subsp.<br>holartica FSC200    | 1318                   | 3.26                            |
| <b><i>Haemophilus influenzae</i></b> |                                                      |                        |                                 |
| <b>Accession number</b>              | <b>Strain Name</b>                                   | <b>Number of genes</b> | <b>Percentage of lost genes</b> |
| NC_000907                            | Haemophilus influenzae Rd<br>KW20                    | 1545                   | 2.78                            |
| NC_007146                            | Haemophilus influenzae 86-<br>028NP                  | 1709                   | 0.47                            |
| NC_009566                            | Haemophilus influenzae PittEE                        | 1539                   | 5.65                            |
| NC_009567                            | Haemophilus influenzae<br>PittGG                     | 1581                   | 9.23                            |
| NC_014920                            | Haemophilus influenzae F3031                         | 1676                   | 2.51                            |
| NC_014922                            | Haemophilus influenzae F3047                         | 1681                   | 1.84                            |
| NC_016809                            | Haemophilus influenzae 10810                         | 1765                   | 0.34                            |
| NC_017451                            | Haemophilus influenzae R2866                         | 1723                   | 0.64                            |
| NC_017452                            | Haemophilus influenzae R2846                         | 1570                   | 0.57                            |
| NC_022356                            | Haemophilus influenzae<br>KR494                      | 1648                   | 1.82                            |
| <b><i>Listeria monocytogenes</i></b> |                                                      |                        |                                 |
| <b>Accession number</b>              | <b>Strain Name</b>                                   | <b>Number of genes</b> | <b>Percentage of lost genes</b> |
| NC_002973                            | Listeria monocytogenes<br>serotype 4b str. F2365     | 2779                   | 0.94                            |
| NC_003210                            | Listeria monocytogenes EGD-e                         | 2818                   | 0.18                            |
| NC_011660                            | Listeria monocytogenes<br>HCC23                      | 2917                   | 3.36                            |
| NC_012488                            | Listeria monocytogenes                               | 2729                   | 0.55                            |

|           |                                                 |      |      |
|-----------|-------------------------------------------------|------|------|
|           | Clip81459                                       |      |      |
| NC_013766 | Listeria monocytogenes 08-5578                  | 2945 | 0.31 |
| NC_013768 | Listeria monocytogenes 08-5923                  | 2911 | 0.27 |
| NC_017529 | Listeria monocytogenes L99                      | 2874 | 3.24 |
| NC_017537 | Listeria monocytogenes M7                       | 2920 | 3.15 |
| NC_017544 | Listeria monocytogenes 10403S                   | 2781 | 0.18 |
| NC_017545 | Listeria monocytogenes J0161                    | 2894 | 0.38 |
| NC_017546 | Listeria monocytogenes FSL R2-561               | 2861 | 0.28 |
| NC_017547 | Listeria monocytogenes Finland 1998             | 2742 | 0.55 |
| NC_018584 | Listeria monocytogenes ATCC 19117               | 2816 | 0.11 |
| NC_018585 | Listeria monocytogenes SLCC2378                 | 2824 | 0.14 |
| NC_018586 | Listeria monocytogenes SLCC2540                 | 2856 | 0.11 |
| NC_018587 | Listeria monocytogenes SLCC2755                 | 2828 | 0.11 |
| NC_018588 | Listeria monocytogenes SLCC2372                 | 2885 | 0.10 |
| NC_018589 | Listeria monocytogenes SLCC2479                 | 2882 | 0.10 |
| NC_018590 | Listeria monocytogenes SLCC2376                 | 2731 | 2.71 |
| NC_018591 | Listeria monocytogenes serotype 7 str. SLCC2482 | 2826 | 0.04 |
| NC_018592 | Listeria monocytogenes SLCC5850                 | 2833 | 0.11 |
| NC_018593 | Listeria monocytogenes                          | 2786 | 0.22 |

|                                                  |                                               |                        |                                 |
|--------------------------------------------------|-----------------------------------------------|------------------------|---------------------------------|
|                                                  | SLCC7179                                      |                        |                                 |
| NC_018642                                        | Listeria monocytogenes L312                   | 2778                   | 0.11                            |
| NC_019556                                        | Listeria monocytogenes serotype 4b str. LL195 | 2797                   | 0.86                            |
| NC_021829                                        | Listeria monocytogenes J1816                  | 2744                   | 3.79                            |
| NC_022568                                        | Listeria monocytogenes EGD                    | 2820                   | 0.11                            |
| <b><i>Mycobacterium tuberculosis</i> Complex</b> |                                               |                        |                                 |
| <b>Accession number</b>                          | <b>Strain Name</b>                            | <b>Number of genes</b> | <b>Percentage of lost genes</b> |
| NC_002755                                        | Mycobacterium tuberculosis CDC1551            | 3933                   | 2.85                            |
| NC_002945                                        | Mycobacterium bovis AF2122/97                 | 3665                   | 0.19                            |
| NC_008769                                        | Mycobacterium bovis BCG str. Pasteur 1173P2   | 3642                   | 0.69                            |
| NC_009525                                        | Mycobacterium tuberculosis H37Ra              | 3747                   | 0.32                            |
| NC_009565                                        | Mycobacterium tuberculosis F11                | 3662                   | 0.96                            |
| NC_012207                                        | Mycobacterium bovis BCG str. Tokyo 172        | 3661                   | 0.25                            |
| NC_012943                                        | Mycobacterium tuberculosis KZN 1435           | 3781                   | 0.11                            |
| NC_015758                                        | Mycobacterium africanum GM041182              | 3578                   | 2.07                            |
| NC_016768                                        | Mycobacterium tuberculosis KZN 4207           | 3724                   | 0.24                            |
| NC_016804                                        | Mycobacterium bovis BCG str. Mexico           | 3667                   | 0.57                            |
| NC_016934                                        | Mycobacterium tuberculosis UT205              | 3602                   | 1.92                            |
| NC_017522                                        | Mycobacterium tuberculosis CCDC5180           | 3353                   | 9.39                            |

|                               |                                                               |                            |                                     |
|-------------------------------|---------------------------------------------------------------|----------------------------|-------------------------------------|
| NC_017523                     | Mycobacterium tuberculosis<br>CCDC5079                        | 3404                       | 9.81                                |
| NC_017524                     | Mycobacterium tuberculosis<br>CTRI-2                          | 3672                       | 0.35                                |
| NC_018078                     | Mycobacterium tuberculosis<br>KZN 605                         | 3727                       | 0.72                                |
| NC_018143                     | Mycobacterium tuberculosis<br>H37Rv                           | 3826                       | 0.16                                |
| NC_020089                     | Mycobacterium tuberculosis<br>7199-99 complete genome         | 3719                       | 0.38                                |
| NC_020245                     | Mycobacterium bovis BCG str.<br>Korea 1168P                   | 3826                       | 0.73                                |
| NC_020559                     | Mycobacterium tuberculosis<br>str. Erdman = ATCC 35801<br>DNA | 3958                       | 1.87                                |
| NC_022350                     | Mycobacterium tuberculosis<br>str. Haarlem                    | 3769                       | 0.61                                |
| <i>Neisseria meningitidis</i> |                                                               |                            |                                     |
| <b>Accession number</b>       | <b>Strain Name</b>                                            | <b>Number of<br/>genes</b> | <b>Percentage of<br/>lost genes</b> |
| NC_003112                     | Neisseria meningitidis MC58                                   | 1706                       | 2.17                                |
| NC_003116                     | Neisseria meningitidis Z2491                                  | 1723                       | 1.80                                |
| NC_008767                     | Neisseria meningitidis FAM18                                  | 1708                       | 1.76                                |
| NC_010120                     | Neisseria meningitidis 053442                                 | 1775                       | 1.24                                |
| NC_013016                     | Neisseria meningitidis alpha14                                | 1737                       | 2.71                                |
| NC_017501                     | Neisseria meningitidis 8013                                   | 1735                       | 0.81                                |
| NC_017505                     | Neisseria meningitidis<br>alpha710                            | 1804                       | 1.44                                |
| NC_017512                     | Neisseria meningitidis WUE<br>2594                            | 1774                       | 2.25                                |
| NC_017513                     | Neisseria meningitidis G2136                                  | 1713                       | 0.99                                |
| NC_017514                     | Neisseria meningitidis M01-<br>240149                         | 1712                       | 0.58                                |

|                                        |                                       |                        |                                 |
|----------------------------------------|---------------------------------------|------------------------|---------------------------------|
| NC_017515                              | Neisseria meningitidis M04-240196     | 1720                   | 0.81                            |
| NC_017516                              | Neisseria meningitidis H44/76         | 1721                   | 0.76                            |
| NC_017517                              | Neisseria meningitidis M01-240355     | 1742                   | 0.40                            |
| NC_017518                              | Neisseria meningitidis NZ-05/33       | 1708                   | 0.88                            |
| <b><i>Pseudomonas aeruginosa</i></b>   |                                       |                        |                                 |
| <b>Accession number</b>                | <b>Strain Name</b>                    | <b>Number of genes</b> | <b>Percentage of lost genes</b> |
| NC_002516                              | Pseudomonas aeruginosa PAO1           | 5407                   | 0.94                            |
| NC_008463                              | Pseudomonas aeruginosa UCBPP-PA14     | 5685                   | 0.39                            |
| NC_009656                              | Pseudomonas aeruginosa PA7 chromosome | 5984                   | 6.99                            |
| NC_011770                              | Pseudomonas aeruginosa LESB58         | 5697                   | 1.14                            |
| NC_017548                              | Pseudomonas aeruginosa M18            | 5511                   | 0.31                            |
| NC_017549                              | Pseudomonas aeruginosa NCGM2.S1       | 6043                   | 0.17                            |
| NC_018080                              | Pseudomonas aeruginosa DK2            | 5687                   | 1.58                            |
| NC_020912                              | Pseudomonas aeruginosa B136-33,       | 5624                   | 0.14                            |
| NC_021577                              | Pseudomonas aeruginosa RP73           | 5578                   | 1.20                            |
| NC_022808                              | Pseudomonas aeruginosa PA1            | 5570                   | 1.56                            |
| NC_023019                              | Pseudomonas aeruginosa MTB-1          | 5863                   | 0.22                            |
| NC_023066                              | Pseudomonas aeruginosa LES431         | 5763                   | 0.49                            |
| NC_023149                              | Pseudomonas aeruginosa SCV20265       | 6025                   | 0.13                            |
| <b><i>Streptococcus pneumoniae</i></b> |                                       |                        |                                 |

| <b>Accession number</b> | <b>Strain Name</b>                       | <b>Number of genes</b> | <b>Percentage of lost genes</b> |
|-------------------------|------------------------------------------|------------------------|---------------------------------|
| NC_003028               | Streptococcus pneumoniae<br>TIGR4        | 1942                   | 1.18                            |
| NC_003098               | Streptococcus pneumoniae R6              | 1690                   | 2.19                            |
| NC_008533               | Streptococcus pneumoniae D39             | 1777                   | 0.96                            |
| NC_010380               | Streptococcus pneumoniae<br>Hungary19A-6 | 1949                   | 2.36                            |
| NC_010582               | Streptococcus pneumoniae<br>CGSP14       | 1941                   | 0.93                            |
| NC_011072               | Streptococcus pneumoniae G54             | 1901                   | 0.47                            |
| NC_011900               | Streptococcus pneumoniae<br>ATCC 700669  | 1839                   | 1.25                            |
| NC_012466               | Streptococcus pneumoniae JJA             | 1882                   | 1.01                            |
| NC_012467               | Streptococcus pneumoniae<br>P1031        | 1840                   | 1.03                            |
| NC_012468               | Streptococcus pneumoniae<br>70585        | 1932                   | 0.52                            |
| NC_012469               | Streptococcus pneumoniae<br>Taiwan19F-14 | 1847                   | 0.65                            |
| NC_014251               | Streptococcus pneumoniae<br>TCH8431/19A  | 1997                   | 0.15                            |
| NC_014494               | Streptococcus pneumoniae<br>AP200        | 1981                   | 0.66                            |
| NC_014498               | Streptococcus pneumoniae<br>670-6B       | 2038                   | 0.44                            |
| NC_017591               | Streptococcus pneumoniae<br>INV104       | 1717                   | 2.33                            |
| NC_017592               | Streptococcus pneumoniae<br>OXC141       | 1708                   | 2.17                            |
| NC_017593               | Streptococcus pneumoniae<br>INV200       | 1774                   | 1.01                            |
| NC_017769               | Streptococcus pneumoniae                 | 1909                   | 0.52                            |



|                        | ST556                                               |                 |                          |
|------------------------|-----------------------------------------------------|-----------------|--------------------------|
| NC_018594              | Streptococcus pneumoniae<br>SPNA45                  | 1773            | 5.08                     |
| NC_018630              | Streptococcus pneumoniae<br>gamPNI0373              | 1881            | 0.64                     |
| NC_022655              | Streptococcus pneumoniae<br>A026 genome             | 1762            | 2.27                     |
| <i>Yersinia pestis</i> |                                                     |                 |                          |
| Accession number       | Strain Name                                         | Number of genes | Percentage of lost genes |
| NC_003143              | Yersinia pestis CO92                                | 3459            | 1.36                     |
| NC_004088              | Yersinia pestis KIM 10                              | 3636            | 0.83                     |
| NC_005810              | Yersinia pestis biovar Microtus<br>str. 91001       | 3593            | 2.00                     |
| NC_008149              | Yersinia pestis Nepal516                            | 3633            | 0.00                     |
| NC_008150              | Yersinia pestis Antiqua                             | 3734            | 0.37                     |
| NC_009381              | Yersinia pestis Pestoides F                         | 3563            | 1.77                     |
| NC_010159              | Yersinia pestis Angola                              | 3467            | 6.86                     |
| NC_014029              | Yersinia pestis Z176003                             | 3250            | 1.11                     |
| NC_017154              | Yersinia pestis D106004                             | 3326            | 0.54                     |
| NC_017160              | Yersinia pestis D182038                             | 3315            | 0.94                     |
| NC_017168              | Yersinia pestis A1122                               | 3701            | 0.30                     |
| NC_017265              | Yersinia pestis biovar<br>Medievalis str. Harbin 35 | 3851            | 2.83                     |

<sup>a</sup>Number of genes from each strain used for the construction of pangenomes (see Materials and Methods)

<sup>b</sup>Percent of “near core” gene loss. Calculated as  $100 * L / T$ , where L is the number of “near core” core pangenomes that are absent from the genome and T is the total number of genes present within that genome, that were used to construct the species pangenome.

**Table S2.** List of bacterial strains removed from our analysis

| <i>Campylobacter jejuni</i>               |                                                             |
|-------------------------------------------|-------------------------------------------------------------|
| Accession number                          | Strain Name                                                 |
| NC_002163                                 | Campylobacter jejuni subsp. jejuni NCTC 11168 = ATCC 700819 |
| NC_022351                                 | Campylobacter jejuni subsp. jejuni 00-2538                  |
| NC_022362                                 | Campylobacter jejuni subsp. jejuni 00-2425                  |
| NC_021834                                 | Campylobacter jejuni 32488                                  |
| <i>Clostridium botulinum</i>              |                                                             |
| Accession number                          | Strain Name                                                 |
| NC_010674                                 | Clostridium botulinum B str. Eklund 17B                     |
| NC_010723                                 | Clostridium botulinum E3 str. Alaska E43                    |
| NC_015425                                 | Clostridium botulinum BKT015925                             |
| <i>Escherichia coli-Shigella Group</i>    |                                                             |
| Accession number                          | Strain Name                                                 |
| NC_017644                                 | Escherichia coli NA114                                      |
| NC_017632                                 | Escherichia coli UM146                                      |
| NC_017634                                 | Escherichia coli O83:H1 str. NRG 857C                       |
| NC_022912                                 | Shigella dysenteriae 1617                                   |
| NC_020518                                 | Escherichia coli str. K-12 substr. MDS42 DNA                |
| NC_010473                                 | Escherichia coli str. K-12 substr. DH10B                    |
| NC_017651                                 | Escherichia coli str. 'clone D i2'                          |
| <i>Listeria monocytogenes</i>             |                                                             |
| Accession number                          | Strain Name                                                 |
| NC_017728                                 | Listeria monocytogenes 07PF0776                             |
| NC_020557                                 | Listeria monocytogenes La111                                |
| NC_020558                                 | Listeria monocytogenes N53-1                                |
| NC_021830                                 | Listeria monocytogenes J1-220                               |
| <i>Mycobacterium Tuberculosis Cluster</i> |                                                             |
| Accession number                          | Strain Name                                                 |
| NC_017026                                 | Mycobacterium tuberculosis RGTB327                          |
| NC_017528                                 | Mycobacterium tuberculosis RGTB423                          |

|                               |                                                    |
|-------------------------------|----------------------------------------------------|
| NC_021054                     | Mycobacterium tuberculosis str.<br>Beijing/NITR203 |
| NC_021192                     | Mycobacterium tuberculosis str.<br>Haarlem/NITR202 |
| NC_021193                     | Mycobacterium tuberculosis CAS/NITR204             |
| NC_021194                     | Mycobacterium tuberculosis EAI5/NITR206            |
| <i>Pseudomonas aeruginosa</i> |                                                    |
| <b>Accession number</b>       | <b>Strain Name</b>                                 |
| NC_022360                     | Pseudomonas aeruginosa c7447m                      |
| NC_022806                     | Pseudomonas aeruginosa PA1R                        |
| NC_022594                     | Pseudomonas aeruginosa PAO1-VE13                   |
| NC_022591                     | Pseudomonas aeruginosa PAO1-VE2                    |
| NC_022361                     | Pseudomonas aeruginosa PAO581                      |

**Table S3.** Summary of recombination analyses by PHIpack software for 14 analyzed species

| <b>Species<sup>a</sup></b>     | <b>Number of tested genes</b> | <b>Recombinant genes (%)</b> | <b>Non-recombinant genes (%)</b> | <b>Non-informative genes (%)</b> |
|--------------------------------|-------------------------------|------------------------------|----------------------------------|----------------------------------|
| <i>B. cereus</i>               | 1171                          | 59.61                        | 40.39                            | 0.00                             |
| <i>C. jejuni</i>               | 428                           | 33.18                        | 66.82                            | 0.00                             |
| <i>C. botulinum</i>            | 943                           | 29.16                        | 70.73                            | 0.11                             |
| <i>C. diphtheriae</i>          | 780                           | 45.51                        | 52.82                            | 1.67                             |
| <i>C. pseudotuberculosis</i> * | 660                           | 0.15                         | 96.21                            | 3.64                             |
| <i>E. coli-Shigella</i>        | 546                           | 78.94                        | 21.06                            | 0.00                             |
| <i>F. tularensis</i> *         | 467                           | 0.00                         | 58.24                            | 41.76                            |
| <i>H. influenzae</i>           | 394                           | 67.01                        | 32.74                            | 0.25                             |
| <i>L. monocytogenes</i>        | 549                           | 45.90                        | 54.10                            | 0.00                             |
| MTBC*                          | 1279                          | 0.00                         | 2.42                             | 97.58                            |
| <i>N. meningitidis</i>         | 550                           | 73.27                        | 25.45                            | 1.27                             |
| <i>P. aeruginosa</i>           | 2039                          | 16.04                        | 82.54                            | 1.42                             |
| <i>S. pneumoniae</i>           | 502                           | 31.87                        | 64.74                            | 3.39                             |
| <i>Y. pestis</i> *             | 1067                          | 0.00                         | 0.00                             | 100.00                           |

<sup>a</sup>Clonal species are marked with an *asterisk*

**Table S4.** Summary of pangene frequencies within the protein pangenomes based on the NCBI annotations of the 14 studied species (prior to HGT correction)

| Species <sup>a</sup>          | Pangenome size <sup>b</sup> | “Rare” pangenes <sup>c</sup> | “Near Core” pangenes <sup>d</sup> | “Core” pangenes <sup>e</sup> |
|-------------------------------|-----------------------------|------------------------------|-----------------------------------|------------------------------|
| <i>B.cereus</i>               | 10116                       | 47.87                        | 5.21                              | 33.17                        |
| <i>C.jejuni</i>               | 2551                        | 34.42                        | 12.35                             | 42.06                        |
| <i>C.botulinum</i>            | 5632                        | 41.10                        | 9.34                              | 41.87                        |
| <i>C.diphtheriae</i>          | 3292                        | 32.75                        | 3.77                              | 51.00                        |
| <i>C.pseudotuberculosis</i> * | 2577                        | 16.14                        | 14.40                             | 60.03                        |
| <i>E.coli-Shigella</i>        | 12282                       | 68.02                        | 13.02                             | 12.43                        |
| <i>F.tularensis</i> *         | 1781                        | 13.53                        | 10.61                             | 57.50                        |
| <i>H.influenzae</i>           | 2782                        | 42.45                        | 12.47                             | 37.67                        |
| <i>L.monocytogenes</i>        | 4379                        | 34.64                        | 6.42                              | 51.56                        |
| <i>MTBC</i> *                 | 4490                        | 15.70                        | 14.30                             | 63.74                        |
| <i>N.meningitidis</i>         | 2717                        | 35.04                        | 7.21                              | 47.55                        |
| <i>P.aeruginosa</i>           | 9029                        | 36.49                        | 8.34                              | 48.84                        |
| <i>S.pneumoniae</i>           | 3327                        | 41.66                        | 8.48                              | 37.57                        |
| <i>Y.pestis</i> *             | 4583                        | 18.94                        | 11.78                             | 55.27                        |

<sup>a</sup>Clonal species are marked with an *asterisk*

<sup>b</sup>Number of pangenes (orthologous gene clusters) within pangenome

<sup>c</sup>% of pangenes that are found in less than 25% of strains of a species

<sup>d</sup>% of pangenes that are found in over 75% of strains of a species, but are not found in all strains

<sup>e</sup>% of pangenes found in all strains of a species

**Table S5.** Correlations between aAAI<sup>a</sup> and Percentage of genes lost<sup>b</sup> in the different bacterial species

| <b>Species<sup>c</sup></b>    | <b>Number of genomes</b> | <b>Spearman Rho</b> | <b>P-value</b> |
|-------------------------------|--------------------------|---------------------|----------------|
| <i>B.cereus</i>               | 13                       | -0.61               | 0.036          |
| <i>C. jejuni</i>              | 13                       | -0.36               | 0.208          |
| <i>C. botulinum</i>           | 10                       | -0.48               | 0.150          |
| <i>C. diphtheriae</i>         | 13                       | -0.58               | 0.040          |
| <i>C.pseudotuberculosis</i> * | 15                       | -0.70               | 0.009          |
| <i>E. coli-Shigella</i>       | 60                       | -0.12               | 0.363          |
| <i>F. tularensis</i> *        | 12                       | -0.77               | 0.010          |
| <i>H. influenzae</i>          | 10                       | -0.22               | 0.496          |
| <i>L. monocytogenes</i>       | 26                       | -0.32               | 0.110          |
| MTBC*                         | 20                       | -0.47               | 0.039          |
| <i>N. meningitidis</i>        | 14                       | -0.70               | 0.012          |
| <i>P. aeruginosa</i>          | 13                       | 0.19                | 0.503          |
| <i>S. pneumoniae</i>          | 21                       | 0.14                | 0.522          |
| <i>Y. pestis</i> *            | 12                       | -0.71               | 0.018          |

<sup>a</sup>Denotes for each strain within each species the average AAI for its pairwise comparisons to all other strains within that species

<sup>b</sup>For each strain we calculated the percentage of genes that were clearly lost from that genome as  $100 * L / T$ , where L is the number of “near core” core pangenes that are absent from the genome and T is the total number of genes present within that genome, that were used to construct the species pangenome

<sup>c</sup>Clonal species are marked with an *asterisk*

**Table S6.** Summary of pangene frequencies within the RAST annotated, length-corrected protein pangenomes of the 14 studied species

| Species <sup>a</sup>          | Pangenome size <sup>b</sup> | “Rare” pangenes <sup>c</sup> | “Near Core” pangenes <sup>d</sup> | “Core” pangenes <sup>e</sup> |
|-------------------------------|-----------------------------|------------------------------|-----------------------------------|------------------------------|
| <i>B.cereus</i>               | 9589                        | 45.3                         | 5.3                               | 35.2                         |
| <i>C.jejuni</i>               | 2568                        | 35.7                         | 8.3                               | 45.8                         |
| <i>C.botulinum</i>            | 5499                        | 39.6                         | 8.2                               | 44.6                         |
| <i>C.diphtheriae</i>          | 3309                        | 34.5                         | 4.1                               | 50.1                         |
| <i>C.pseudotuberculosis</i> * | 2259                        | 6.8                          | 11.7                              | 73.7                         |
| <i>E.coli-Shigella</i>        | 11280                       | 62.9                         | 12.2                              | 17.3                         |
| <i>F.tularensis</i> *         | 1720                        | 2.6                          | 10.3                              | 70                           |
| <i>H.influenzae</i>           | 2893                        | 44.0                         | 8.5                               | 40.1                         |
| <i>L.monocytogenes</i>        | 4172                        | 31.3                         | 5.9                               | 55                           |
| MTBC*                         | 4124                        | 2.8                          | 11.5                              | 79.8                         |
| <i>N.meningitidis</i>         | 3284                        | 36                           | 8.3                               | 42.8                         |
| <i>P.aeruginosa</i>           | 8140                        | 28.4                         | 8.6                               | 56.6                         |
| <i>S.pneumoniae</i>           | 3021                        | 36.8                         | 7.3                               | 44.9                         |
| <i>Y.pestis</i> *             | 4228                        | 4.3                          | 14.1                              | 75.2                         |

<sup>a</sup>Clonal species are marked with an *asterisk*

<sup>b</sup>Number of pangenes (orthologous gene clusters) within pangenome

<sup>c</sup>% of pangenes that are found in less than 25% of strains of a species

<sup>d</sup>% of pangenes that are found in over 75% of strains of a species, but are not found in all strains

<sup>e</sup>% of pangenes found in all strains of a species
